# Supplementary material for: High yield synthesis and optical properties of MgF2nanowires with high aspect ratios
Source: Royal Society of Chemistry journal article supplement (doi:10.1039/c5ra27173h), 2016-01-01
Supplement: c5ra27173h1.pdf [file c5ra27173h1.pdf]

## Supporting Information

### High yield synthesis and optical properties of $\text{MgF}_2$ nanowires with high aspect ratios

Saleem Abbas, Yang Huang, Jing Lin, Aumber Abbas, Xuewen Xu, Jie Li, Sai Wang, Xing Jin, Chengchun Tang

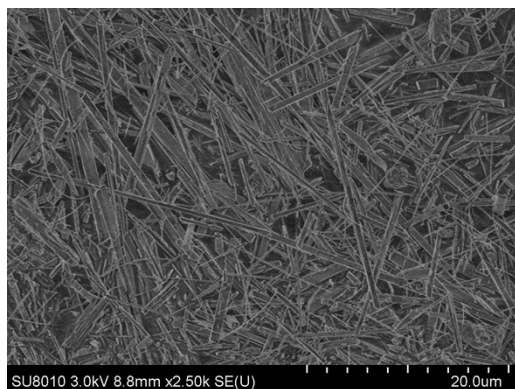

**Fig. S1** SEM image of  $\text{MgF}_2$  nanostructures at 950°C showing very thick fibers.

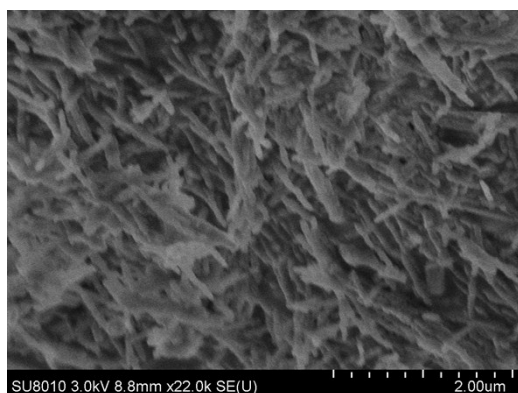

**Fig. S2** SEM image of  $\text{MgF}_2$  nanostructures at different heating zone.
